# Supplementary material for: 4-(Phenylselanyl)-2H-chromen-2-one-Loaded Nanocapsule Suspension—A Promising Breakthrough in Pain Management: Comprehensive Molecular Docking, Formulation Design, and Toxicological and Pharmacological Assessments in Mice
Source: MDPI journal article supplement (doi:10.3390/pharmaceutics16020269), 2024-02-14
Supplement: s1 [file s1]

## Supplementary Material

### **4-(Phenylselanyl)-2H-chromen-2-one-loaded Nanocapsule Suspension - A Promising Breakthrough in Pain Management: Comprehensive Molecular Docking, Formulation Design, Toxicological, and Pharmacological Assessments in Mice**

Caren Aline Ramson da Fonseca<sup>1</sup>, Vinicius Costa Prado<sup>2</sup>, Jaini Janke Paltian<sup>1</sup>, Jean Carlo Kazmierczak<sup>3</sup>, Ricardo Frederico Schumacher<sup>3</sup>, Marcel Henrique Marcondes Sari<sup>2</sup>, Larissa Marafiga Cordeiro<sup>4</sup>, Aline Franzen da Silva<sup>4</sup>, Felix Alexandre Antunes Soares<sup>4</sup>, Robson da Silva Oliboni<sup>5</sup>, Cristiane Luchese<sup>1</sup>, Letícia Cruz<sup>2\*</sup> and Ethel Antunes Wilhelm<sup>1\*</sup>

- 1 Graduate Program in Biochemistry and Bioprospecting, Biochemical Pharmacology Research Laboratory, Federal University of Pelotas, Pelotas, CEP 96010-900, RS, Brazil; carenramson@hotmail.com; jaini\_paltian@hotmail.com; cristiane\_luchese@yahoo.com.br; \*Correspondence: ethelwilhelm@yahoo.com.br
- 2 Graduate Program in Pharmaceutical Sciences, Pharmaceutical Technology Laboratory, Federal University of Santa Maria, Santa Maria, CEP 97105-900, RS, Brazil; vini132007@gmail.com; marcelsarih@hotmail.com; \*Correspondence: leticia.cruz@ufsm.br
- 3 Graduate Program in Chemistry, Chemistry Department, Federal University of Santa Maria, Santa Maria, CEP 97105-900, RS, Brazil; jeanckazmierczak@gmail.com; ricardo.schumacher@ufsm.br
- 4 Graduate Program in Biological Sciences: Toxicological Biochemistry, Federal University of Santa Maria, Santa Maria, CEP 97105-900, RS, Brazil; larissa.marafiga@hotmail.com; alinefranzen@hotmail.com; felix@ufsm.br
- 5 Center for Chemical, Pharmaceutical, and Food Sciences, CCQFA, Federal University of Pelotas, Pelotas, CEP 96010-900, RS, Brazil; rooliboni@gmail.com

## SUPPLEMENTARY FIGURES

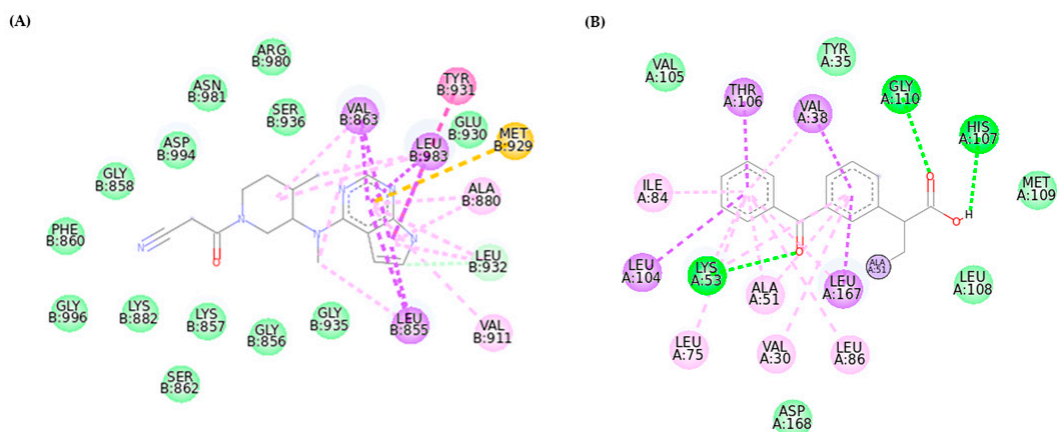

**Figure S1.** Interaction maps for (A) tofacitinib with JAK and (B) ketoprofen with MAPK.

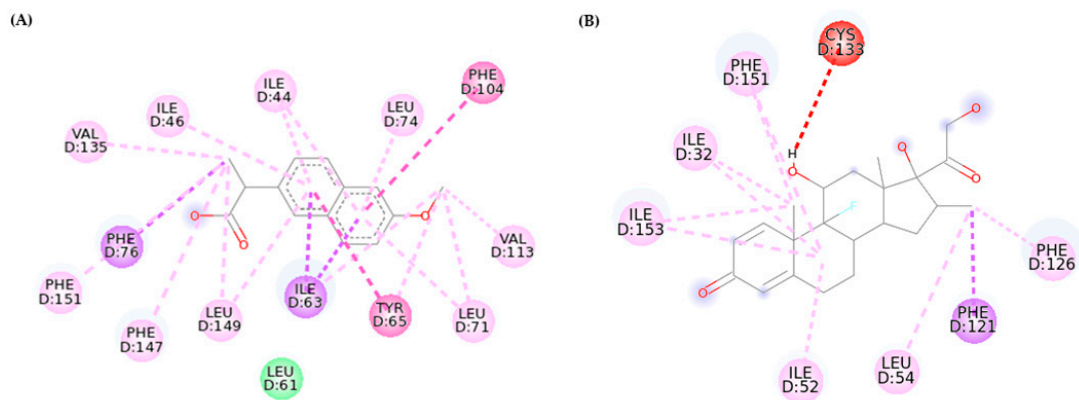

**Figure S2.** Interaction maps for (A) naproxen and (B) dexamethasone with TLR4.

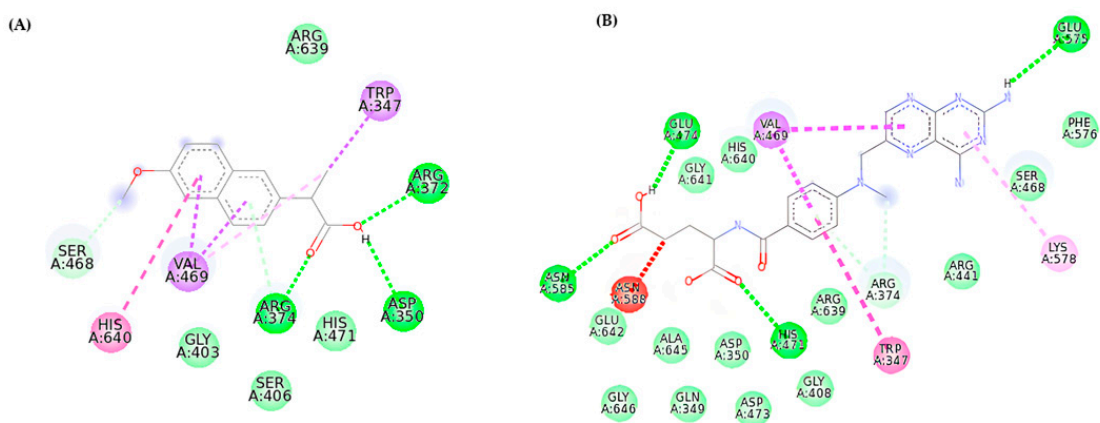

**Figure S3.** Interaction maps for (A) naproxen and (B) methotrexate with PAD4.

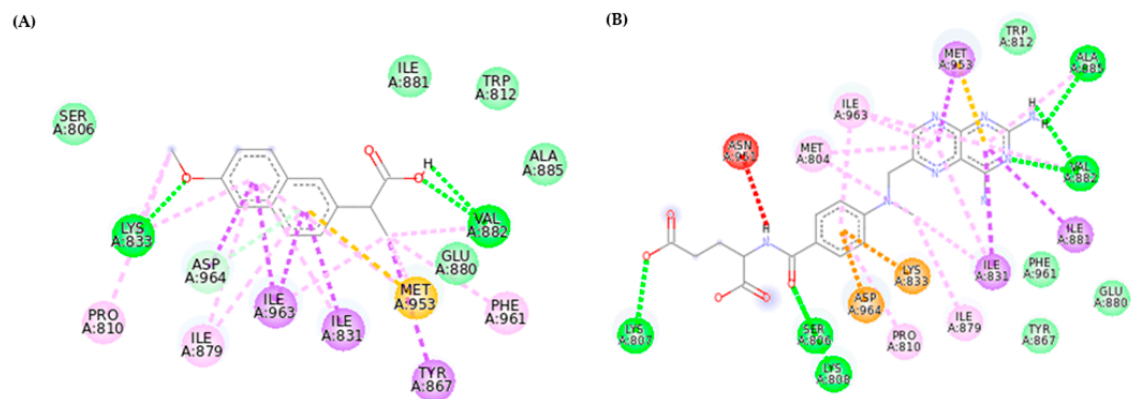

**Figure S4.** Interaction maps for (A) naproxen and (B) methotrexate with PI3K.

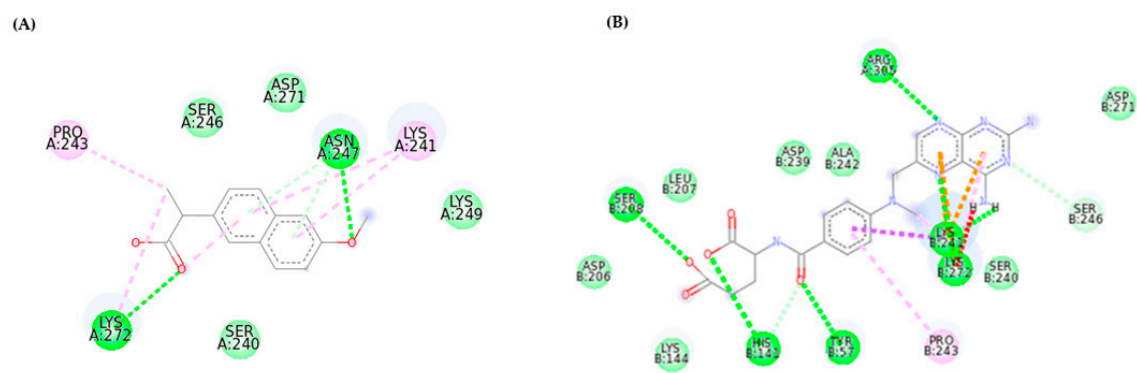

**Figure S5.** Interaction maps for (A) naproxen and (B) methotrexate with NFkB.

(A)

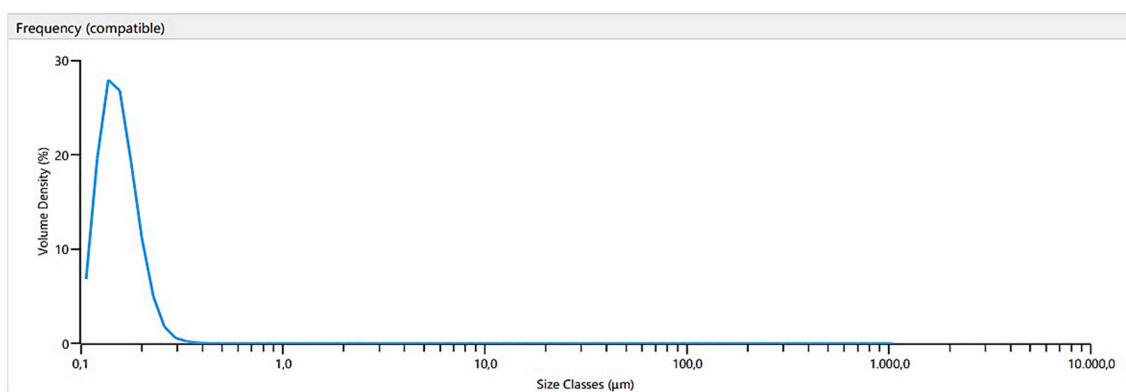

(B)

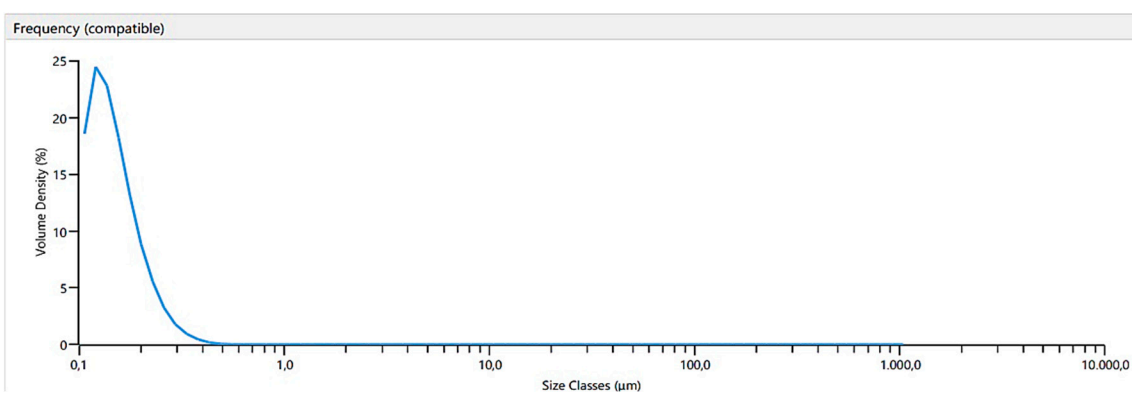

**Figure S6:** Representative granulometric profiles determined by laser diffraction at their initial time of 4-PSO NC (**Figure S6A**) and NC P (**Figure S6B**), respectively. The nanoparticles population is in the nanometric range ( $< 1 \mu\text{m}$ ).

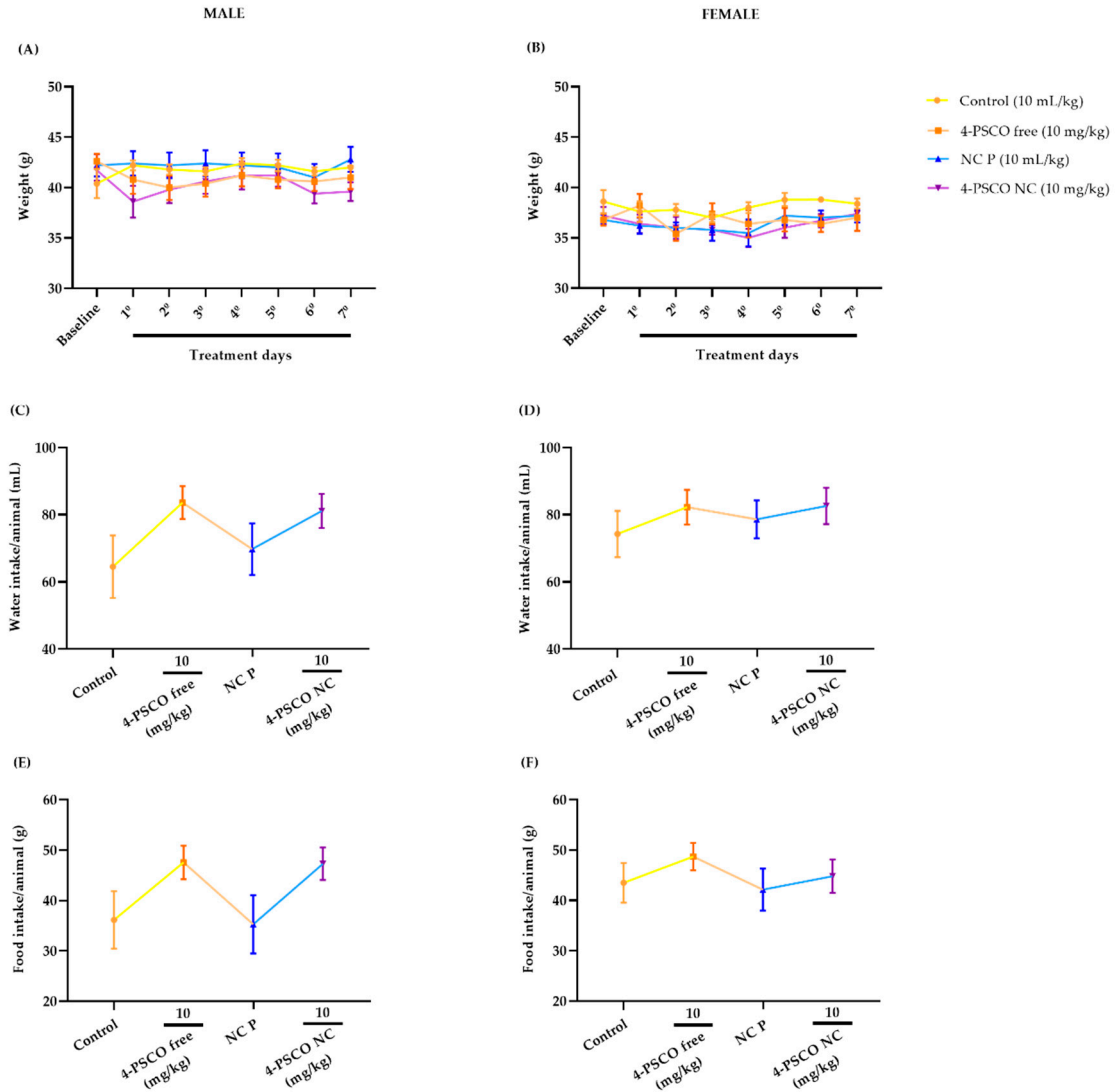

**Figure S7:** Effect of 4-PSCO free (10 mg/kg), 4-PSCO NC (10 mg/kg), and NC P (10 mL/kg) repeated treatment in body weight of male (**Figure S7A**) and female (**Figure S7B**) animals, water intake of male (**Figure S7C**) and female (**Figure S7D**) mice and food intake of male (**Figure S7E**) and female (**Figure S7F**) mice during the experiment. Each column represents the mean  $\pm$  S.E.M. of 5 mice in each group. Data were analyzed by one-way ANOVA followed by the Tukey's test ( $p > 0.05$ ).

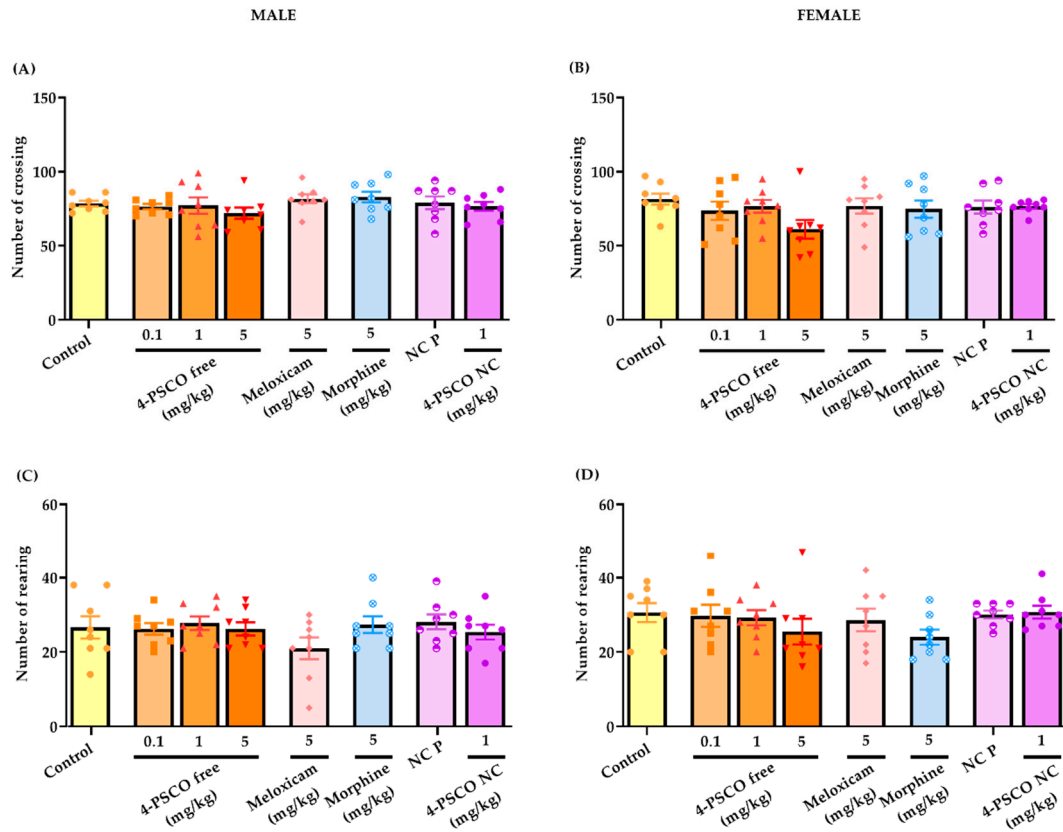

**Figure S8:** Effect of 4-PSCO free (0.1, 1, and 5 mg/kg), 4-PSCO NC (1 mg/kg), NC P (10 mL/kg), meloxicam (5 mg/kg), and morphine (5 mg/kg) on open field test - number of crossing (**Figures S8A and S8B**), and number of rearing (**Figures S8C and S8D**) in male and female mice. Each column represents the mean  $\pm$  S.E.M. of 8 mice in each group (one-way ANOVA followed by the Tukey's test) ( $p > 0.05$ ).

## SUPPLEMENTARY TABLES

**Table S1:** The absolute and relative organ weight of mice treated orally with 4-PSCO free, NC P, and 4-PSCO NC in a short-term toxicity study.

|                        | Tissues                   |             |             |
|------------------------|---------------------------|-------------|-------------|
|                        | SPLEEN                    | LIVER       | KIDNEYS     |
| Experimental groups    | Parameter                 |             |             |
| MALE                   | Absolute organ weight (g) |             |             |
| Control (10 mL/kg)     | 0.13 ± 0.01               | 0.58 ± 0.04 | 1.93 ± 0.05 |
| 4-PSCO free (10 mg/kg) | 0.11 ± 0.01               | 0.59 ± 0.01 | 2.00 ± 0.15 |
| NC P (10 mL/kg)        | 0.12 ± 0.01               | 0.61 ± 0.03 | 2.1 ± 0.06  |
| 4-PSCO NC (10 mg/kg)   | 0.10 ± 0.01               | 0.56 ± 0.01 | 2.1 ± 0.10  |
|                        | Relative organ weight (%) |             |             |
| Control (10 mL/kg)     | 0.31 ± 0.02               | 4.61 ± 0.13 | 1.40 ± 0.11 |
| 4-PSCO free (10 mg/kg) | 0.26 ± 0.03               | 4.84 ± 0.23 | 1.44 ± 0.06 |
| NC P (10 mL/kg)        | 0.28 ± 0.01               | 4.82 ± 0.18 | 1.41 ± 0.05 |
| 4-PSCO NC (10 mg/kg)   | 0.25 ± 0.02               | 5.32 ± 0.22 | 1.42 ± 0.06 |
| FEMALE                 | Absolute organ weight (g) |             |             |
| Control (10 mL/kg)     | 0.15 ± 0.01               | 0.43 ± 0.02 | 1.81 ± 0.05 |
| 4-PSCO free (10 mg/kg) | 0.14 ± 0.01               | 0.41 ± 0.02 | 1.81 ± 0.15 |
| NC P (10 mL/kg)        | 0.13 ± 0.01               | 0.44 ± 0.01 | 1.82 ± 0.17 |
| 4-PSCO NC (10 mg/kg)   | 0.12 ± 0.01               | 0.42 ± 0.02 | 1.7 ± 0.15  |
|                        | Relative organ weight (%) |             |             |
| Control (10 mL/kg)     | 0.39 ± 0.02               | 4.71 ± 0.12 | 1.12 ± 0.06 |
| 4-PSCO free (10 mg/kg) | 0.38 ± 0.03               | 4.91 ± 0.40 | 1.09 ± 0.04 |
| NC P (10 mL/kg)        | 0.35 ± 0.01               | 4.88 ± 0.44 | 1.19 ± 0.02 |
| 4-PSCO NC (10 mg/kg)   | 0.33 ± 0.01               | 4.54 ± 0.39 | 1.13 ± 0.04 |

The values are reported as mean ± S.E.M. The data were analyzed using a one-way ANOVA followed by Tukey multiple comparison test. The relative weight (g) was calculated as (organ weight (g)/body weight of the animal on sacrifice day (g)) × 100).

**Table S2:** Results of statistical analyses of the water consumption, food consumption, and body weight of mice treated orally with 4-PSCO free, NC P, and 4-PSCO NC in a short-term toxicity study.

| Parameter                     | MALE                             | FEMALE                           |
|-------------------------------|----------------------------------|----------------------------------|
| <b>Water consumption</b>      | $F_{(3, 28)} = 1.703, p > 0.05$  | $F_{(3, 28)} = 0.4482, p > 0.05$ |
| <b>Food consumption</b>       | $F_{(3, 28)} = 2.104, p > 0.05$  | $F_{(3, 28)} = 0.6245, p > 0.05$ |
| <b>Body weight (Baseline)</b> | $F_{(3, 16)} = 0.6402, p > 0.05$ | $F_{(3, 16)} = 1.090, p > 0.05$  |
| <b>Body weight (Day 1)</b>    | $F_{(3, 16)} = 1.508, p > 0.05$  | $F_{(3, 16)} = 0.9436, p > 0.05$ |
| <b>Body weight ( Day 2)</b>   | $F_{(3, 16)} = 1.174, p > 0.05$  | $F_{(3, 16)} = 1.878, p > 0.05$  |
| <b>Body weight ( Day 3)</b>   | $F_{(3, 16)} = 0.6991, p > 0.05$ | $F_{(3, 16)} = 1.030, p > 0.05$  |
| <b>Body weight ( Day 4)</b>   | $F_{(3, 16)} = 0.3293, p > 0.05$ | $F_{(3, 16)} = 1.464, p > 0.05$  |
| <b>Body weight ( Day 5)</b>   | $F_{(3, 16)} = 0.4139, p > 0.05$ | $F_{(3, 16)} = 1.532, p > 0.05$  |
| <b>Body weight ( Day 6)</b>   | $F_{(3, 16)} = 0.9136, p > 0.05$ | $F_{(3, 16)} = 2.846, p > 0.05$  |
| <b>Body weight (Day 7)</b>    | $F_{(3, 16)} = 2.058, p > 0.05$  | $F_{(3, 16)} = 0.6042, p > 0.05$ |

The data were analyzed using a one-way ANOVA followed by Tukey multiple comparison test.



**Table S3:** Results of statistical analyses of the absolute organ weight of mice treated orally with 4-PSCO free, NC P, and 4-PSCO NC in a short-term toxicity study.

| Absolute organ weight (g)         |                                  |
|-----------------------------------|----------------------------------|
| MALE                              | FEMALE                           |
| SPLEEN                            | SPLEEN                           |
| $F_{(3, 16)} = 1.739, p > 0.05$   | $F_{(3, 16)} = 1.893, p > 0.05$  |
| LIVER                             | LIVER                            |
| $F_{(3, 16)} = 2.381, p > 0.05$   | $F_{(3, 16)} = 0.2263, p > 0.05$ |
| KIDNEYS                           | KIDNEYS                          |
| $F_{(3, 16)} = 0.09429, p > 0.05$ | $F_{(3, 16)} = 0.8628, p > 0.05$ |

Data were evaluated through ordinary one-way ANOVA followed by the Tukey's test ( $p > 0.05$ ).

**Table S4:** Thiobarbituric acid reactive species (TBARS) levels of male and female mice submitted to the repeated treatment with 4-PSCO free or 4-PSCO NC.

|                        | Tissues               |             |            |            |
|------------------------|-----------------------|-------------|------------|------------|
|                        | BRAIN                 | SPINAL CORD | LIVER      | KIDNEYS    |
| Experimental groups    | Parameter             |             |            |            |
| MALE                   | TBARS                 |             |            |            |
|                        | (nmol MDA/mg protein) |             |            |            |
| Control (10 mL/kg)     | 18.8 ± 1.0            | 20.4 ± 1.4  | 61.7 ± 2.8 | 29.5 ± 2.3 |
| 4-PSCO free (10 mg/kg) | 18.5 ± 1.3            | 17.2 ± 1.2  | 66.5 ± 4.8 | 35.6 ± 2.7 |
| NC P (10 mL/kg)        | 22.0 ± 2.1            | 19.7 ± 1.4  | 66.9 ± 4.5 | 34.6 ± 4.6 |
| 4-PSCO NC (10 mg/kg)   | 17.3 ± 0.5            | 19.6 ± 0.9  | 65.0 ± 1.7 | 31.8 ± 2.4 |
| FEMALE                 | TBARS                 |             |            |            |
|                        | (nmol MDA/mg protein) |             |            |            |
| Control (10 mL/kg)     | 20.9 ± 1.5            | 24.4 ± 1.1  | 72.2 ± 3.1 | 31.5 ± 1.5 |
| 4-PSCO free (10 mg/kg) | 22.8 ± 1.5            | 22.8 ± 1.4  | 73.2 ± 2.5 | 32.9 ± 3.0 |
| NC P (10 mL/kg)        | 19.1 ± 2.0            | 20.9 ± 0.7  | 69.0 ± 2.7 | 36.3 ± 3.6 |
| 4-PSCO NC (10 mg/kg)   | 21.7 ± 1.9            | 22.8 ± 2.1  | 77.7 ± 1.7 | 35.2 ± 2.0 |

Values are expressed as mean ± S.E.M. of 5 animals/group to each parameter. Data were evaluated through ordinary one-way ANOVA followed by the Tukey's test ( $p > 0.05$ ).

**Table S5:** Non-protein thiol (NPSH) levels of male and female mice submitted to the repeated treatment with 4-PSCO free or 4-PSCO NC.

|                        | Tissues                 |             |           |           |
|------------------------|-------------------------|-------------|-----------|-----------|
|                        | BRAIN                   | SPINAL CORD | LIVER     | KIDNEYS   |
| Experimental groups    | Parameter               |             |           |           |
| MALE                   | NPSH                    |             |           |           |
|                        | (nmol of NPSH/g tissue) |             |           |           |
| Control (10 mL/kg)     | 2.7 ± 0.2               | 3.3 ± 0.1   | 3.5 ± 0.2 | 3.2 ± 0.1 |
| 4-PSCO free (10 mg/kg) | 2.4 ± 0.1               | 3.7 ± 0.1   | 3.4 ± 0.1 | 3.2 ± 0.1 |
| NC P (10 mL/kg)        | 2.5 ± 0.3               | 3.4 ± 0.1   | 3.4 ± 0.2 | 3.6 ± 0.3 |
| 4-PSCO NC (10 mg/kg)   | 3.1 ± 0.1               | 3.6 ± 0.2   | 3.7 ± 0.2 | 3.2 ± 0.1 |
| FEMALE                 | NPSH                    |             |           |           |
|                        | (nmol of NPSH/g tissue) |             |           |           |
| Control (10 mL/kg)     | 3.2 ± 0.1               | 3.6 ± 0.2   | 3.4 ± 0.1 | 3.2 ± 0.1 |
| 4-PSCO free (10 mg/kg) | 3.0 ± 0.1               | 3.8 ± 0.3   | 3.1 ± 0.1 | 3.3 ± 0.1 |
| NC P (10 mL/kg)        | 2.9 ± 0.1               | 4.1 ± 0.3   | 3.1 ± 0.1 | 3.1 ± 0.1 |
| 4-PSCO NC (10 mg/kg)   | 2.8 ± 0.3               | 4.1 ± 0.2   | 3.2 ± 0.2 | 3.2 ± 0.2 |

Values are expressed as mean ± S.E.M. of 5 animals/group to each parameter. Data were evaluated through ordinary one-way ANOVA followed by the Tukey's test ( $p > 0.05$ ).

**Table S6:** Results of statistical analyses of thiobarbituric acid reactive species (TBARS) and non-protein thiol (NPSH) levels of male and female mice subjected to repeated treatment with 4-PSCO free or 4-PSCO NC.

| TBARS (nmol MDA/mg protein)      |                                  |
|----------------------------------|----------------------------------|
| MALE                             | FEMALE                           |
| BRAIN                            | BRAIN                            |
| $F_{(3, 16)} = 2.121, p > 0.05$  | $F_{(3, 16)} = 0.7890, p > 0.05$ |
| SPINAL CORD                      | SPINAL CORD                      |
| $F_{(3, 16)} = 1.286, p > 0.05$  | $F_{(3, 16)} = 0.9531, p > 0.05$ |
| LIVER                            | LIVER                            |
| $F_{(3, 16)} = 0.4185, p > 0.05$ | $F_{(3, 16)} = 2.021, p > 0.05$  |
| KIDNEYS                          | KIDNEYS                          |
| $F_{(3, 16)} = 0.7757, p > 0.05$ | $F_{(3, 16)} = 0.6706, p > 0.05$ |
| NPSH (nmol of NPSH/g tissue)     |                                  |
| BRAIN                            | BRAIN                            |
| $F_{(3, 16)} = 3.172, p > 0.05$  | $F_{(3, 16)} = 0.7593, p > 0.05$ |
| SPINAL CORD                      | SPINAL CORD                      |
| $F_{(3, 16)} = 0.8110, p > 0.05$ | $F_{(3, 16)} = 0.9031, p > 0.05$ |
| LIVER                            | LIVER                            |
| $F_{(3, 16)} = 0.8830, p > 0.05$ | $F_{(3, 16)} = 0.8644, p > 0.05$ |
| KIDNEYS                          | KIDNEYS                          |
| $F_{(3, 16)} = 1.342, p > 0.05$  | $F_{(3, 16)} = 0.1715, p > 0.05$ |

Data were evaluated through ordinary one-way ANOVA followed by the Tukey's test ( $p > 0.05$ ).

**Table S7:** Alanine aminotransferase (ALT), aspartate aminotransferase (AST) activities, and urea levels of male and female mice submitted to the repeated treatment with 4-PSCO free or 4-PSCO NC.

| Tissues                |            |            |              |
|------------------------|------------|------------|--------------|
| PLASMA                 |            |            |              |
| Parameter              |            |            |              |
| MALE                   | ALT (U/L)  | AST (U/L)  | UREA (mg/dL) |
| Control (10 mL/kg)     | 8.1 ± 1.7  | 29.7 ± 4.5 | 29.0 ± 1.7   |
| 4-PSCO free (10 mg/kg) | 11.4 ± 1.8 | 27.8 ± 5.9 | 23.3 ± 1.7   |
| NC P (10 mL/kg)        | 10.1 ± 0.7 | 19.6 ± 2.7 | 31.1 ± 1.6   |
| 4-PSCO NC (10 mg/kg)   | 8.7 ± 0.6  | 25.1 ± 7.4 | 28.0 ± 1.9   |
| FEMALE                 | ALT (U/L)  | AST (U/L)  | UREA (mg/dL) |
| Control (10 mL/kg)     | 10.2 ± 1.9 | 17.1 ± 2.5 | 30.8 ± 2.4   |
| 4-PSCO free (10 mg/kg) | 10.7 ± 3.1 | 18.7 ± 2.2 | 24.6 ± 1.6   |
| NC P (10 mL/kg)        | 12.7 ± 1.6 | 15.2 ± 3.0 | 26.2 ± 1.7   |
| 4-PSCO NC (10 mg/kg)   | 10.3 ± 1.5 | 16.0 ± 1.7 | 26.6 ± 1.5   |

Values are expressed as mean ± S.E.M. of 5 animals/group to each parameter. Data were evaluated through ordinary one-way ANOVA followed by the Tukey's test ( $p > 0.05$ ).

**Table S8:** Results of statistical analyses of alanine aminotransferase (ALT), aspartate aminotransferase (AST), and Urea levels in male and female mice subjected to repeated treatment with 4-PSCO free or 4-PSCO NC.

| ALT (U/L)                        |                                  |
|----------------------------------|----------------------------------|
| MALE                             | FEMALE                           |
| PLASMA                           | PLASMA                           |
| $F_{(3, 16)} = 1.291, p > 0.05$  | $F_{(3, 16)} = 0.2982, p > 0.05$ |
| AST (U/L)                        |                                  |
| $F_{(3, 16)} = 0.6416, p > 0.05$ | $F_{(3, 16)} = 0.3836, p > 0.05$ |
| UREA (mg/dL)                     |                                  |
| $F_{(3, 16)} = 3.646, p > 0.05$  | $F_{(3, 16)} = 2.000, p > 0.05$  |

Data were evaluated through ordinary one-way ANOVA followed by the Tukey's test ( $p > 0.05$ ).
